## RESEARCH ARTICLE

# The cross-cultural adaptation and psychometric properties of the Graded Chronic Pain Scale-Revised—Simplified Chinese version

Bing Liang<sup>☉</sup>, Yuejin Wu<sup>☉</sup>, Jiaxin Zhang, Shumin Hao, Feng Li<sup>✉</sup>\*

School of Nursing, Jilin University, Changchun, China

☉ These authors contributed equally to this work.

\* [fli@jlu.edu.cn](mailto:fli@jlu.edu.cn)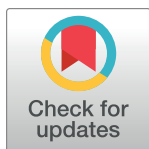

## Abstract

Chronic pain is a prevalent issue worldwide and is a significant contributor to human suffering and disability. The Graded Chronic Pain Scale-Revised has exhibited favorable reliability and validity. However, its applicability yet to be explored in China. We aimed to create a simplified Chinese version of the Graded Chronic Pain Scale-Revised for chronic pain patients by conducting cross-cultural adaptation and psychometric evaluation. This study employs a two-phase design. In phase 1, the Graded Chronic Pain Scale-Revised was cross-culturally translated and adapted in accordance with international guidelines. In phase 2, the simplified Chinese version of the Graded Chronic Pain Scale-Revised was administered to 417 participants along with Numerical Rating Scale to assess its psychometric properties. The final analysis consisted of data from 376 participants. The scale had a Cronbach's  $\alpha$  coefficient of 0.944. Moreover, the scale exhibited excellent content validity and was divided into two dimensions: identifying high impact chronic pain; and the Pain, Enjoyment, and General Activities subscale. Exploratory and confirmatory factor analyses revealed that these dimensions had a good model fit. Additionally, the simplified Chinese version of the Graded Chronic Pain Scale-Revised demonstrated good convergent and discriminant validity. The receiver operating characteristic curve demonstrated that grades 2 and 3 had a good predictive effect on limiting participants' work ability, and the area under the receiver operating characteristic curve was equal to 0.91. The present study demonstrates the successful adaptation of the Graded Chronic Pain Scale-Revised into Simplified Chinese, with the revised version exhibiting favorable psychometric properties. This scale addresses the shortcomings of domestic chronic pain grading assessment tools, providing a valuable instrument for evaluating the severity of chronic pain in Chinese clinical practice and serving as a reference and basis for other research related to chronic pain.

## OPEN ACCESS

**Citation:** Liang B, Wu Y, Zhang J, Hao S, Li F (2023) The cross-cultural adaptation and psychometric properties of the Graded Chronic Pain Scale-Revised—Simplified Chinese version. PLoS ONE 18(10): e0292747. <https://doi.org/10.1371/journal.pone.0292747>

**Editor:** Fatih Özden, Mugla Sitki Kocman Universitesi, TURKEY

**Received:** August 29, 2023

**Accepted:** September 27, 2023

**Published:** October 10, 2023

**Copyright:** © 2023 Liang et al. This is an open access article distributed under the terms of the [Creative Commons Attribution License](https://creativecommons.org/licenses/by/4.0/), which permits unrestricted use, distribution, and reproduction in any medium, provided the original author and source are credited.

**Data Availability Statement:** All relevant data are within the paper and its [Supporting Information](#) files.

**Funding:** This project was funded by Jilin Province Health Science and Technology Capability Improvement Project (Grant number 2021JC041) and Norman Bethune Program of Jilin University (Grant number 2023B41). The funders had no role in study design, data collection and analysis, decision to publish, or preparation of the manuscript.

**Competing interests:** The authors have declared that no competing interests exist.

## 1 Introduction

According to the International Association for the Study of Pain (IASP), chronic pain is defined as pain that lasts for three months or longer, exceeding the normal healing time of tissues [1, 2]. Regardless of whether it is caused by illnesses, chronic pain does not immediately endanger human life, but many people have to live with it [3, 4]. It is a major source of human suffering and disability [5]. In the United States, pain has been identified as a major public health problem, with 50 million adults experiencing chronic pain and 20 million adults suffering from severe pain [5]. A systematic review found that the prevalence of chronic pain among Asian adults ranged from 7.1% (Malaysian adults) to 90.8% (elderly Chinese adults) [6]. Long-term pain not only causes patients great physical pain and seriously affects their quality of life but also causes psychological or mental distress. Anxiety and depression are reported to be very common among chronic pain patients [7]. The dual burden of physical and psychological distress may lead to poor health outcomes for patients as well as increases in personal and societal health care costs and burdens [8]. Therefore, early identification of chronic pain and strengthening symptom management are necessary. In the treatment of chronic pain patients, pain assessment has been described as a fundamental aspect of pain management, and it plays a crucial role in nursing [9]. Scientific pain assessment tools are key to effective pain treatment, and clarifying the pain grade of the tested subjects is one of the prerequisites for targeted and efficient treatment.

Many studies have investigated the effectiveness of chronic pain assessment tools. Among these tools, the Visual Analog Scale (VAS) remains the gold standard for chronic pain assessment [10]. It can be used to measure not only the intensity of pain, but also the degree of pain relief [11]. Its reliability ranges from 0.71 to 0.94, and its validity ranges from 0.62 to 0.91 [12], thus demonstrating its effectiveness and stability. This pain assessment method was introduced in China in the past century. However, despite being a simple and effective pain assessment tool, it may be influenced by different factors, such as age, gender, and personality traits [13]. Additionally, its item settings are relatively abstract, and the response rate is lower in older adults [14]. Therefore, the VAS is not suitable for patients with low education levels or cognitive impairment. Other commonly used chronic pain assessment tools include the Numerical Rating Scale (NRS), which has a reliability of up to 0.95 and a validity greater than 0.86. The advantages of the NRS include its simplicity and intuitiveness. It is currently used in populations of all ages [12].

The Graded Chronic Pain Scale (GCPS) was developed by Michael Von Korff in 1991 [15]. Based on data from 2389 pain patients, this scale was developed using chronic pain-relevant indicators and epidemiological research methods to evaluate the severity of patients' chronic pain. The scale assesses pain severity and pain-related disability on a scale ranging from grades 0 to 4 [15]. The GCPS has good reliability and validity in evaluating pain grades [15], and has shown advantages over other pain scales because it measures health-related outcomes more comprehensively [16]. The GCPS was originally developed in English and tested in several English-speaking populations, showing good reliability and validity [17–21]. In addition, it has been successfully adapted to Arabic [16], Spanish [22], Turkish [23], and other languages. However, chronic pain patients usually have multiple pain sites [24], and the essence of the GCPS is to evaluate pain status based on anatomical definitions [15]; therefore, it cannot be used to comprehensively evaluate patients' pain from a biopsychosocial perspective. Moreover, because the GCPS uses two time frames (3 months and 6 months) to evaluate subjects' pain grades on a scale of 0–10, the scoring rules are relatively complex [25]. Therefore, researchers have further developed and revised the GCPS to enhance its practicality.

In 2019, Michael Von Korff revised the GCPS to create the Graded Chronic Pain Scale-Revised (GCPS-R), which can be used to identify chronic pain patients and differentiate the

severity of chronic pain (mild, bothersome, and high-impact chronic pain) [25]. The scale was initially validated in a sample of 2021 adults and strongly predicted five indicators of activity limitations, with a receiver operator curve of 0.76 to 0.89, providing a simpler and more effective way to evaluate chronic pain [25]. Since its development, it has been translated into Spanish and Turkish [26, 27] with good reliability and validity [23], while a simplified Chinese version has not yet been developed and validated.

In this study, we aimed to analyze the psychometric properties of the Graded Chronic Pain Scale-Revised—Simplified Chinese version (C-GCPS-R) and explore its applicability in the Chinese population. This work can provide a reliable tool for Chinese clinical staff to assess chronic pain promptly, accurately, and effectively. This tool can be used to grade the pain status of Chinese chronic pain patients and develop personalized interventions based on different pain grades to reduce patients' pain symptoms, ultimately improving their quality of life and preventing adverse outcomes.

## 2 Methods

### 2.1 Study design

This study utilized a two-phase design. In the first phase, the GCPS-R was translated and cross-culturally adapted to develop the simplified Chinese version [25], using the cross-cultural adaptation procedures recommended by Brislin [28] and Jones [29], and to conduct a pretest. Feedback from participants was used to modify the scale's wording, phrasing, structure, and other relevant aspects. In the second phase, a cross-sectional study was conducted to evaluate the psychometric properties of the C-GCPS-R. Reliability was analyzed using internal consistency, while validity was analyzed using multiple indicators. In addition, the study employed the ROC to calculate the optimal cutoff score, to examine the impact of pain severity on work, and to assess its predictive accuracy.

### 2.2 Phase I: Translation and cross-cultural adaptation of the GCPS-R

**2.2.1 Permissions.** Authorization was obtained from Professor Michael Von Korff, the author of the GCPS-R, via email.

**2.2.2 Translation and back translation.** The translation and back-translation of the scale was conducted using Brislin's intercultural translation model [30], which involved inviting two bilingual medical English teachers (T1 and T2) to independently translate the scale. The research team then combined the two translation versions, discussed any inconsistencies with T1 and T2, and developed the initial C-GCPS-R1. In the back-translation stage, another bilingual medical English teacher (T3) and an English-speaking medical English expert (T4) were invited to independently translate the C-GCPS-R1 into English. The research team reviewed, organized, and revised the GCPS-R and the two back-translated versions, eliminating any inconsistencies in meaning and terminology, thus yielding the C-GCPS-R2. To ensure translation quality, none of the three medical English teachers or the medical English expert were involved in this study, nor were they informed in advance that they would be asked to undertake any translation work. Finally, cultural adaptation was conducted to ensure the specificity and effectiveness of the C-GPS-R2. A cultural adaptation team consisting of seven experts with clinical experience was invited to participate in this study. The selection criteria for experts were as follows: 1) research areas included basic or rehabilitative nursing, rehabilitation medicine, pain-related specialties, or clinical practice; 2) familiar with related research fields at home and abroad; 3) possessing intermediate or higher professional technical titles, as well as a master's degree or above; 4) engaged in this field for more than 8 years; and 5) having a certain degree of enthusiasm for this study and complying with the principles of voluntary and

informed consent. Without violating the original scale, the cultural adaptation team of experts modified and integrated the items, meanings, and expressions of the scale through expert inquiry forms issued by the research team, making the language conform to Chinese expression habits. The C-GCPS-R3 was further revised by the research team and can be completely interchangeable with the original scale in terms of concept and meaning.

**2.2.3 Content validity.** The content validity index (CVI) comprises the item-level CVI (I-CVI) and the scale-level CVI (S-CVI). The primary objective is to assess the relevance, representativeness, and appropriateness of the content and measurement range of the items. The content validity experts, along with the cross-cultural adaptation experts, rated the association of each item in the C-GCPS-R3 with chronic pain patients using a four-point rating questionnaire, ranging from "not related" to "strongly related", represented by the numbers 1–4. The I-CVI was determined by calculating the percentage of experts who scored the items as 3 or 4, while the S-CVI was determined by calculating the mean of the I-CVI. Additionally, the item-total correlation was used to test the correlation between the items. An item-total correlation coefficient of less than 0.40 indicates a weak correlation between the item and the overall scale, and such value indicate that the item should be considered for deletion.

**2.2.4 Pretest.** After determining the C-GCPS-R3, we conducted a pretest using this scale. By using a convenience sampling method, we selected a sufficient number of chronic pain patients who met the inclusion and exclusion criteria from Changchun City, Jilin Province, China, and distributed the C-GCPS-R3 to participants while soliciting feedback on the readability and accuracy of the items. Based on the participants' feedback, we modified the items' expression, wording, and structure to form the C-GCPS-R4.

Following the inclusion and exclusion criteria (consistent with the cross-sectional inclusion and exclusion criteria), we randomly selected 30 participants for a pretest (not participating in the cross-sectional study) to determine whether they could understand the meaning of each item and complete the scale correctly. During the testing process, the participants' understanding of the scale corresponded with the scale's expression content, and there were no unclear items or semantic ambiguities. The time required to complete the scale was approximately 2–3 minutes, and no changes to the scale were necessary. Therefore, following cross-cultural adaptation, the committee approved the final version of the C-GCPS-R (see [S1 File](#)).

## 2.3 Phase 2: Psychometric validation

**2.3.1 Ethical considerations.** This study was conducted as cross-sectional research, which took place in Changchun, Jilin Province, China from 11/4/2023 to 20/6/2023. All experiments were performed in accordance with the Declaration of Helsinki. Ethical approval was obtained by the Human Research Ethics Committee of the School of Nursing, Jilin University (HREC2023041001). All participants signed written informed consent forms, and the participant information involved was kept confidential by the research team. Additionally, it has been duly registered with the Chinese Clinical Registration Center under the registration number ChiCTR2300070399.

**2.3.2 Participants.** Upon approval by the Human Research Ethics Committee of the School of Nursing, Jilin University (HREC2023041001), the study participants were recruited from two tertiary comprehensive hospitals. A total of two cohorts were recruited.

The inclusion criteria for patients were as follows: 1) participants were able to express themselves without hearing impairment or communication impairment; and 2) participants were fully informed and willing to participate in this study. The exclusion criteria were as follows: 1) participants with advanced disease; and 2) participants with known severe mental illness and those receiving emergency or interventional surgery. All participants agreed to participate and signed written informed consent forms.

**2.3.3 Instruments.** The research team, in conjunction with previous studies on the GCPS-R [25] and the epidemiology of chronic pain, measured general characteristics using a structured questionnaire that included 14 items such as age, gender, ethnicity, education level, occupation, smoking status, and opioid drug use. In addition to this, participants were assessed using two instruments, the currently developed the C-GCPS-R and the NRS.

**2.3.4 Graded Chronic Pain Scale-Revised—Simplified Chinese version.** The C-GCPS-R comprises six items. To identify individuals with chronic pain, item 1 assesses the frequency of pain experienced in the past three months (never, some days, most days, everyday). If item 1 is marked "never" or "some days", the pain grade is classified as 0 (chronic pain absent). To identify participants with grade 3 pain, participants are asked about the frequency of pain that has limited their activities or work in the past three months, which constitutes item 2 (never, some days, most days, everyday). If item 1 is marked as 'most days' or 'every day' and item 2 is marked the same, the pain is classified as grade 3 with high-impact chronic pain (HICP). After identifying chronic pain, items 3 to 5 are evaluated, which constitute the Pain, Enjoyment, and General Activity (PEG) scale. These items assess the severity of pain experienced in the past seven days, with each item scored from 0 to 10. Item 3 evaluates the severity of the pain, Item 4 evaluates the degree to which pain affects enjoyment of life, and Item 5 assesses the extent to which the pain affects daily activities. The total PEG score ranges from 0 to 30, with a score below 12 indicating grade 1 (mild chronic pain) and a score of 12 or higher indicating grade 2 (bothersome chronic pain). Item 6 assesses whether the participant is unable to work or has stopped working due to pain, with "yes" or "no" answers.

**2.3.5 Numeric rating scale.** The scale utilized in this study requires participants to assess their pain severity [31] using a numerical value ranging from 0 to 10, with 0 indicating no pain and 10 indicating extreme pain [32]. This method has been widely applied across various age groups and boasts a reliability coefficient of 0.95 and a validity coefficient greater than 0.86 [12]. One study showed a high correlation coefficient between the VAS and the NRS [33], with a correlation coefficient ranging from 0.77 to 0.91. The scale has been extensively implemented in clinical practice in China and has been demonstrated to be both reliable and effective. Given the relatively advanced age of the participants recruited for this study, the NRS was deemed a more intuitive tool for assessing pain intensity than the VAS [34]. Participants were able to easily understand and interpret the results of the NRS.

## 2.4 Data collection

The head of the research team provided uniform training to the researchers, ensuring their proficiency in using and scoring with the C-GCPS-R. The first author supervised and directed the participants throughout the scale completion process, with relevant personnel available to clarify any uncertainties. The scales were distributed and collected on-site, with issues such as incomplete or missing submissions addressed immediately. Prior to data entry, the collected scales were carefully reviewed and any unsatisfactory submissions were removed, including those that were incomplete, scored uniformly, had excessive identical selections, or contained logically inconsistent responses.

## 2.5 Statistical analysis

Data entry was conducted independently by two individuals using Epidata 3.1 software to ensure accuracy. Data analysis was performed using SPSS 26.0 and AMOS 26.0 statistical software. Descriptive statistics were used to describe participant characteristics. Sample 1 was used for exploratory factor analysis (EFA), while sample 2 was used for confirmatory factor analysis (CFA).

Internal consistency reliability was used to evaluate the reliability of the C-GPS-R. Cronbach's  $\alpha$  is the most commonly used internal consistency reliability indicator, and a Cronbach's  $\alpha$  value of  $>0.8$  indicates good scale reliability. Additionally, Cronbach's  $\alpha$  was calculated for each dimension, with values greater than 0.8 indicating good reliability.

EFA and CFA were used to evaluate multiple validity indicators of the scale. The Kaiser–Meyer–Olkin (KMO) test [35] was first used to determine whether the sample size was sufficient for factor analysis. A KMO value closer to 1.0 indicates better factor analysis results, while values below 0.6 suggest that factor analysis is not appropriate. The Bartlett sphericity test [36] was also conducted to determine whether there were strong correlations between variables in the scale. If  $P < 0.05$ , the hypothesis of independence between variables in the scale is not supported, indicating strong correlations. Principal component analysis was used for EFA, with maximum orthogonal variance rotation used to extract common factors. The common factor needed to have a cumulative variance contribution rate  $> 40\%$ , and each item in the scale needed to have a factor load on the common factor of  $>0.4$  to reflect basic information on a dimension of the scale. CFA was used to evaluate the fit of the model, with evaluation indicators including the chi-square freedom ratio ( $X^2/df$ ), root mean square residual (RMR), goodness-of-fit index (GFI), comparative fit index (CFI) and root mean square error of approximation (RMSEA). Additionally, composite reliability (C.R.) and average variance extracted (AVE) were used to evaluate the convergent validity of the C-GCPS-R. AVE values of  $\geq 0.5$  and C.R. values of  $\geq 0.7$  are considered acceptable [37]. Discriminant validity was evaluated by conducting correlation analysis and extracting the square root of AVE, with the square root of AVE for each factor should be greater than the correlation coefficient between that factor and other factors, with a recommended value of AVE  $\geq 0.5$  and correlation values  $\leq 0.85$  for each factor.

Criterion validity is a measure of the relationship between the adapted scale and the selected criterion scale, and it is generally expressed by a correlation coefficient to indicate the degree of similarity between the two scales [38]. A correlation coefficient greater than 0.7 is considered acceptable. To examine the relationship between the C-GCPS-R and the NRS, the criterion validity was evaluated by analyzing the scores of 60 randomly selected participants in Sample 2, which corresponds to 10–20% of the total sample size.

## 3 Results

### 3.1 Participant characteristics

The study involved 417 eligible participants, with sample 1 consisting of 100 individuals and sample 2 consisting of 317 individuals. Of these 417 participants, 376 (with sample 1 consisting of 78 individuals and sample 2 consisting of 298 individuals) provided informed consent and completed the scales in their entirety. Participants indicated that the scales were clear and that the items were well answered. Table 1 summarizes the demographic and clinical characteristics of the participants (Table 1).

### 3.2 Internal consistency reliability

Table 2 displays the Cronbach's  $\alpha$  coefficient values for both the overall and individual items of the C-GCPS-R. The removal of any item from the C-GCPS-R did not significantly increase the Cronbach's  $\alpha$  coefficient, which remained above the recommended value of 0.80. The correlation coefficients between each item of the C-GCPS-R scale and the overall scale ranged from 0.711 (item 1) to 0.929 (item 5), all of which exceeded the recommended value of 0.7.

Table 3 presents the correlation between items, PEG scale and pain grades. The results



Table 1. Sample characteristics (n = 376).

| Variable                                                     |                                | Total(n = 376) | Sample 1(n = 78) | Sample 2(n = 298) |
|--------------------------------------------------------------|--------------------------------|----------------|------------------|-------------------|
| <b>Age (years), N(%)</b>                                     |                                |                |                  |                   |
|                                                              | <18                            | 4              | 0(0.0)           | 4(1.3)            |
|                                                              | 18–60                          | 268            | 40(51.3)         | 228(76.6)         |
|                                                              | >60                            | 104            | 38(48.7)         | 66(22.1)          |
| <b>Sex, N(%)</b>                                             |                                |                |                  |                   |
|                                                              | Male                           | 168            | 36(46.2)         | 132(44.2)         |
|                                                              | Female                         | 208            | 42(53.8)         | 166(55.8)         |
| <b>Ethnicity, N(%)</b>                                       |                                |                |                  |                   |
|                                                              | Han                            | 358            | 70(89.7)         | 288(96.6)         |
|                                                              | Other                          | 18             | 8(10.3)          | 10(3.4)           |
| <b>Education level,N(%)</b>                                  |                                |                |                  |                   |
|                                                              | Elementary school or lower     | 80             | 30(38.5)         | 50(16.8)          |
|                                                              | Secondary or technical schools | 189            | 38(48.7)         | 151(50.7)         |
|                                                              | Bachelor or above              | 107            | 10(12.8)         | 97(32.5)          |
| <b>Marital status, N(%)</b>                                  |                                |                |                  |                   |
|                                                              | Unmarried                      | 76             | 4(5.1)           | 72(24.2)          |
|                                                              | Married                        | 287            | 73(93.6)         | 214(71.8)         |
|                                                              | Divorced                       | 7              | 0(0.0)           | 7(2.3)            |
|                                                              | Bereaved                       | 6              | 1(1.3)           | 5(1.7)            |
| <b>Occupation, N(%)</b>                                      |                                |                |                  |                   |
|                                                              | Unemployed                     | 67             | 15(19.2)         | 52(17.4)          |
|                                                              | Retirement                     | 91             | 25(32.1)         | 66(22.1)          |
|                                                              | Manager                        | 12             | 0(0.0)           | 12(4)             |
|                                                              | Technician                     | 21             | 0(0.0)           | 21(7.0)           |
|                                                              | Employee                       | 24             | 2(2.6)           | 22(7.3)           |
|                                                              | Transporter                    | 3              | 1(1.3)           | 2(0.7)            |
|                                                              | Service personnel              | 32             | 24(30.8)         | 8(2.7)            |
|                                                              | Farmer                         | 20             | 0(0.0)           | 20(6.7)           |
|                                                              | Worker                         | 12             | 0(0.0)           | 12(4.0)           |
|                                                              | Teacher                        | 6              | 1(1.3)           | 5(1.7)            |
|                                                              | Student                        | 39             | 3(3.8)           | 36(12.1)          |
|                                                              | Healthcare Worker              | 33             | 2(2.6)           | 31(10.4)          |
|                                                              | Other                          | 16             | 5(6.4)           | 11(3.9)           |
| <b>Smoking, N(%)</b>                                         |                                |                |                  |                   |
|                                                              | Yes                            | 86             | 18(23.1)         | 68(22.8)          |
|                                                              | No                             | 290            | 60(76.9)         | 230(77.2)         |
| <b>Long-term use of opioids, antidepressants, etc., N(%)</b> |                                |                |                  |                   |
|                                                              | Yes                            | 26             | 8(10.3)          | 18(6.4)           |
|                                                              | No                             | 350            | 70(89.7)         | 280(93.6)         |
| <b>Drinking, N(%)</b>                                        |                                |                |                  |                   |
|                                                              | Yes                            | 81             | 13(16.7)         | 68(22.8)          |
|                                                              | No                             | 295            | 65(83.3)         | 230(77.2)         |
| <b>Receiving medical care (within one year), N(%)</b>        |                                |                |                  |                   |
|                                                              | Yes                            | 158            | 49(62.8)         | 109(36.6)         |
|                                                              | No                             | 218            | 29(37.2)         | 189(63.4)         |
| <b>Chronic diseases, N(%)</b>                                |                                |                |                  |                   |
|                                                              | Yes                            | 99             | 35(44.9)         | 64(21.5)          |

(Continued)

Table 1. (Continued)

| Variable                                       |                                     | Total(n = 376) | Sample 1(n = 78) | Sample 2(n = 298) |
|------------------------------------------------|-------------------------------------|----------------|------------------|-------------------|
|                                                | No                                  | 277            | 43(55.1)         | 234(78.5)         |
| <b>Ways of medical payments, N(%)</b>          |                                     |                |                  |                   |
|                                                | Publicly funded                     | 8              | 1(1.3)           | 7(2.3)            |
|                                                | Medical insurance                   | 239            | 36(46.2)         | 203(68.1)         |
|                                                | New Cooperative Medical System      | 101            | 41(52.6)         | 60(20.1)          |
|                                                | One's Own Expense                   | 28             | 0(0.0)           | 28(9.5)           |
| <b>Pain location (within seven days), N(%)</b> |                                     |                |                  |                   |
|                                                | None                                | 111            | 12(15.4)         | 99(33.2)          |
|                                                | Head                                | 18             | 4(5.1)           | 14(4.7)           |
|                                                | Teeth                               | 10             | 1(1.3)           | 9(3.0)            |
|                                                | Neck                                | 9              | 0(0.0)           | 9(3.0)            |
|                                                | Shoulder                            | 9              | 4(5.1)           | 5(1.7)            |
|                                                | Arms                                | 0              | 0(0.0)           | 0(0.0)            |
|                                                | Hands                               | 4              | 1(1.3)           | 3(1.0)            |
|                                                | Chest                               | 21             | 7(9.0)           | 14(4.7)           |
|                                                | Abdomen                             | 23             | 6(7.7)           | 17(5.7)           |
|                                                | Back                                | 13             | 3(3.8)           | 10(3.4)           |
|                                                | Waist                               | 20             | 2(2.6)           | 18(6.0)           |
|                                                | Hips                                | 3              | 2(2.6)           | 1(0.3)            |
|                                                | Legs                                | 13             | 2(2.6)           | 11(3.7)           |
|                                                | Combined pain of two sites          | 54             | 15(19.2)         | 39(13.1)          |
|                                                | Combined pain of three sites        | 34             | 10(12.8)         | 24(8.1)           |
|                                                | Combined pain of four sites         | 12             | 1(1.3)           | 11(3.7)           |
|                                                | Combined pain of five sites         | 6              | 4(5.1)           | 2(0.7)            |
|                                                | Combined five or more painful sites | 16             | 4(5.1)           | 12(4.0)           |
| <b>Grading, N(%)</b>                           |                                     |                |                  |                   |
|                                                | Grade 0                             | 294            | 55(70.5)         | 239(80.2)         |
|                                                | Grade 1                             | 17             | 2(2.6)           | 15(5)             |
|                                                | Grade 2                             | 15             | 2(2.6)           | 13(4.4)           |
|                                                | Grade 3                             | 50             | 19(24.4)         | 31(10.4)          |

<https://doi.org/10.1371/journal.pone.0292747.t001>

demonstrate strong homogeneity among the items and between the items and the scale, indicating high internal consistency of the total scale.

### 3.3 Validity

**3.3.1 Content validity.** The cultural adaptation of the C-GCPS-R was conducted twice by cultural debugging experts. The first cultural adaptation results showed that the S-CVI of the scale was 0.96, which is greater than 0.9, and the I-CVI was greater than 0.78; however, two experts scored item 2 below 3 points. Therefore, the study continued to culturally adapt the C-GCPS-R, and the second cultural adaptation results showed that the S-CVI of the scale was 1.00, which is greater than 0.9, and the I-CVI was greater than 0.78. The content validity of the scale was excellent. Except for item 6, the correlation coefficients between the other items and the total scale were greater than 0.4 ( $P < 0.01$ ) (see [S1 Table](#)).

**3.3.2 Construct validity.** *3.3.2.1 Exploratory factor analysis.* The EFA results indicate a KMO value of 0.861, which exceeds the recommended threshold of 0.8, and an approximate chi-square value of 553.98 ( $P < 0.01$ ) for the Bartlett sphericity test, indicating that there were



Table 2. Item-Total statistics of the C-GCPS- R.

|                                                | Scale Mean if Item Deleted | Scale Variance if Item Deleted | Corrected Item-Total Correlation | Squared Multiple Correlation | Cronbach's Alpha if Item Deleted |
|------------------------------------------------|----------------------------|--------------------------------|----------------------------------|------------------------------|----------------------------------|
| A1                                             | 7.51                       | 62.372                         | 0.711                            | 0.621                        | 0.918                            |
| A2                                             | 7.72                       | 61.966                         | 0.770                            | 0.672                        | 0.915                            |
| A3                                             | 6.07                       | 37.766                         | 0.935                            | 0.880                        | 0.837                            |
| A4                                             | 6.19                       | 35.985                         | 0.941                            | 0.904                        | 0.839                            |
| A5                                             | 6.34                       | 37.456                         | 0.929                            | 0.879                        | 0.840                            |
| <b>Factor 1</b>                                |                            |                                |                                  |                              |                                  |
| A3                                             | 4.39                       | 24.757                         | 0.932                            | 0.870                        | 0.963                            |
| A4                                             | 4.50                       | 23.133                         | 0.949                            | 0.900                        | 0.950                            |
| A5                                             | 4.65                       | 24.342                         | 0.935                            | 0.878                        | 0.960                            |
| <b>Factor2</b>                                 |                            |                                |                                  |                              |                                  |
| A1                                             | 0.73                       | 0.586                          | 0.754                            | 0.569                        |                                  |
| A2                                             | 0.95                       | 0.620                          | 0.754                            | 0.569                        |                                  |
| <b>C-GCPS-R(total):</b> Cronbach's Alpha 0.944 |                            |                                |                                  |                              |                                  |

Note: C-GCPS- R: Graded Chronic Pain Scale-Revised—Simplified Chinese version.

<https://doi.org/10.1371/journal.pone.0292747.t002>

common factors among the variables and supporting the use of factor analysis. Using principal component analysis and rotation, two common factors were obtained, accounting for a cumulative total variance explained of 95.303%, which exceeds the recommended thresholds of 85%. The component matrix showed that all items had loadings greater than 0.4 on their respective dimensions. According to the factor loadings, the first common factor consisted of three items, namely, item 3 (loading = 0.869), item 4 (loading = 0.898), and item 5 (loading = 0.906). The second common factor consisted of two items, namely, item 1 (loading = 0.917) and item 2 (loading = 0.756). (Table 4) In the original English version, items 3, 4, and 5 constitute the PEG scale, which corresponds to the item contained in the first common factor obtained in this study. Items 1 and 2 in the second common factor are used to identify HCIP, which is also consistent with the logic of the original scale.

**3.3.2.2 Confirmatory factor analysis.** The CFA was conducted on 298 samples of sample 2 using AMOS 26.0 software to further verify the compatibility between the structure of the C-GCPS-R and the original English version. Based on the dimension of the GCPS-R, the study

Table 3. Interitem correlation statistics of the C-GCPS- R.

|              | A1                 | A2                 | A3                 | A4                 | A5                 | PEG <sup>a</sup>   | Grade <sup>b</sup> |
|--------------|--------------------|--------------------|--------------------|--------------------|--------------------|--------------------|--------------------|
| <b>A1</b>    | 1.000              |                    |                    |                    |                    |                    |                    |
| <b>A2</b>    | 0.754 <sup>c</sup> | 1.000              |                    |                    |                    |                    |                    |
| <b>A3</b>    | 0.700 <sup>c</sup> | 0.729 <sup>c</sup> | 1.000              |                    |                    |                    |                    |
| <b>A4</b>    | 0.655 <sup>c</sup> | 0.735 <sup>c</sup> | 0.924 <sup>c</sup> | 1.000              |                    |                    |                    |
| <b>A5</b>    | 0.659 <sup>c</sup> | 0.720 <sup>c</sup> | 0.905 <sup>c</sup> | 0.929 <sup>c</sup> | 1.000              |                    |                    |
| <b>PEG</b>   | 0.689 <sup>c</sup> | 0.749 <sup>c</sup> | 0.969 <sup>c</sup> | 0.978 <sup>c</sup> | 0.971 <sup>c</sup> | 1.000              |                    |
| <b>Grade</b> | 0.748 <sup>c</sup> | 0.749 <sup>c</sup> | 0.593 <sup>c</sup> | 0.614 <sup>c</sup> | 0.615 <sup>c</sup> | 0.625 <sup>c</sup> | 1.000              |

Note: <sup>a</sup> The PEG score is derived from the sum of items 3, 4, and 5.

<sup>b</sup> Grade is calculated using the C-GCPS-R grading algorithm.

<sup>c</sup> Correlation is significant at the 0.01 level (two-tailed).

<https://doi.org/10.1371/journal.pone.0292747.t003>

Table 4. Factor loadings of the C-GCPS- R.

| Item                              | 1      | 2      |
|-----------------------------------|--------|--------|
| A1                                |        | 0.917  |
| A2                                |        | 0.756  |
| A3                                | 0.869  |        |
| A4                                | 0.898  |        |
| A5                                | 0.906  |        |
| Eigenvalues                       | 85.867 | 9.436  |
| Percentage of variance            | 56.648 | 38.655 |
| Cumulative percentage of variance | 56.648 | 95.303 |

<https://doi.org/10.1371/journal.pone.0292747.t004>

established two latent variables, identifying the HCIP and PEG subscales, and set five items as observed variables to establish a predictive model for CFA. In this model,  $X^2/df$  is 3.799, RMR is 0.022, AGFI is 0.926, GFI is 0.980, TLI is 0.984, CFI is 0.994, and RMSEA is 0.097. All indicators were within the recommended range, indicating a good model fit. The model fit indicators and the standardized two-factor structural equation model are shown in Table 5 and Fig 1.

According to Table 6, the C.R. values for each dimension are above 0.70, and the AVE values are above 0.50. This indicates that the C-GCPS-R dimensions have good convergent validity, meaning that each item is able to reflect its corresponding dimension well.

Table 7 demonstrates that the square root of AVE for both common factor 1 and common factor 2 exceeds the correlation coefficients between these factors and other factors, indicating a strong discriminant validity between the two common factors.

The NRS was used as the calibration tool of the C-GCPS-R. The mean scores of the PEG scale were highly correlated with those of the NRS, with a correlation coefficient of 0.969 and a significance level of  $P < 0.01$  (Table 8).

**3.3.2.3 Diagnostic accuracy.** Furthermore, with regard to the relationship between chronic pain and participants' work ability, we conducted binary logistic regression analysis. The results indicated a significant impact of chronic pain on participants' work ability ( $P < 0.001$ ). (Table 9) Therefore, we plotted ROC for variables and determined that a chronic pain score of greater than 11 had the strongest predictive accuracy for work impact (see S2 Table). The sensitivity and specificity were found to be 81.3% and 82.4%, respectively, and the area under the curve was 0.91 (95% confidence interval [CI] 0.87–0.95), which was consistent with the predictive effect of chronic pain at GCPS-R grade 2 ( $\geq 12$  points) or higher on work impact (Fig 2).

## 4 Discussion

In this paper, we report the successful translation and cross-cultural adaptation of the GCPS-R. We observed a high completion rate of the scale, indicating high levels of comprehensibility and acceptability among participants. We found the C-GCPS-R to be reliable and valid in grading chronic pain among Chinese participants.

Table 5. Model fit statistics for the C-GCPS- R.

| Model             | Chi-square/df | GFI   | RMR   | AGFI  | TLI   | CFI   | RMSEA |
|-------------------|---------------|-------|-------|-------|-------|-------|-------|
| Model fit index   | 3.799         | 0.980 | 0.022 | 0.926 | 0.984 | 0.994 | 0.097 |
| Recommended value | <5            | >0.8  | <0.05 | >0.8  | >0.9  | >0.8  | <0.1  |

Note:  $X^2/df$ : Chi-square freedom ratio; GFI, Goodness of fit index; RMR, Root Mean Square Residual; AGFI, Adjusted goodness of fit index; TLI, Tucker-Lewis Index; CFI, comparative fit index; RMSEA, root mean square error of approximation

<https://doi.org/10.1371/journal.pone.0292747.t005>

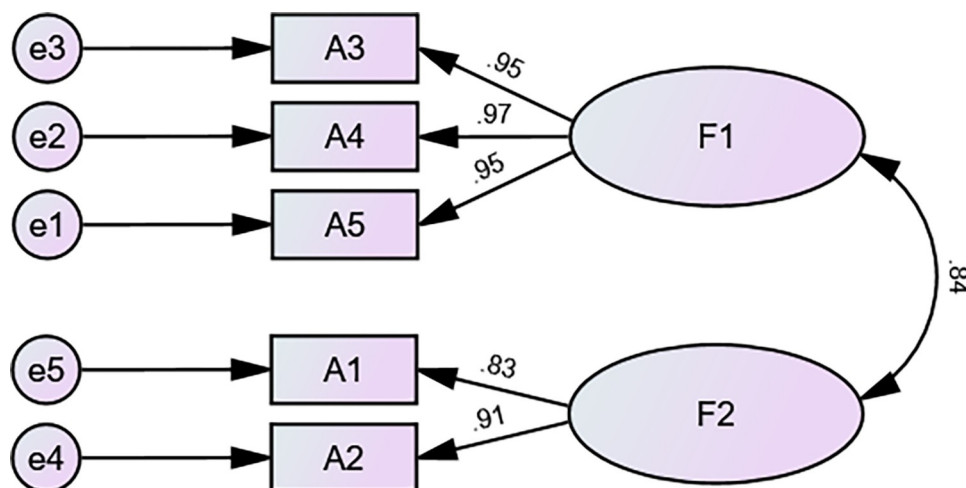

**Fig 1. Standardized two-factor structural equation model of the C-GCPS- R.** F1, PEG scale; F2, Identify HCIP.

<https://doi.org/10.1371/journal.pone.0292747.g001>

We ensured equivalence with the English version through two cross-cultural adaptations, each involving a panel of seven experts with diverse research backgrounds. The resulting simplified Chinese version of the C-GCPS-R was found to be content valid. This development may greatly benefit the assessment of pain severity grading among the Chinese population.

After conducting correlation analysis on the scale, we found that, except for item 6, the correlation coefficients between each item of the C-GCPS-R and the total scale were greater than 0.4 ( $P < 0.01$ ), indicating that each item is both interrelated and has good discriminant validity. In the Turkish version of the GCPS-R psychometric assessment, analysis of item 6 was also eliminated [27]. This is because item 6 in the original English version was mainly used to confirm the impact of chronic pain on participants' work, and adding this item clarified the clinical significance of chronic pain without affecting the severity grading of chronic pain [25], resulting in a low correlation with item 6. In subsequent psychometric validation, this item was not included in this study.

The overall internal consistency  $\alpha$  coefficient of the C-GPS-R was high at 0.944, which has also been observed in other scales translated from English to simplified Chinese [39–41]. In addition, the internal consistency  $\alpha$  coefficient of the C-GCPS-R was higher than that of the Italian version ( $\alpha = 0.86$ ) [42], German version ( $\alpha = 0.82$ ) [43], and Turkish version ( $\alpha = 0.903$ ) [27]. These results indicate that the GCPS-R has good internal consistency and stability when used in different countries and populations, especially for the Chinese population. To further explore the impact of scale items on the quality of the scale, this study calculated the changes in Cronbach's  $\alpha$  (0.792–0.813) after each item was deleted one by one. The results

**Table 6. Convergent validity.**

| Factor | Item | Estimate | S.E.  | C.R.   | P   | AVE  | C.R. |
|--------|------|----------|-------|--------|-----|------|------|
| F1     | A3   | 0.952    | 0.026 | 37.274 | *** | 0.92 | 0.97 |
| F1     | A4   | 0.971    | 0.026 | 41.424 | *** |      |      |
| F1     | A5   | 0.954    |       |        |     |      |      |
| F2     | A1   | 0.831    | 0.054 | 17.464 | *** | 0.76 | 0.86 |
| F2     | A2   | 0.907    |       |        |     |      |      |

Note: \*\*\*:  $p < 0.001$ (two-tailed); AVE: Average variance extracted; C.R.: Composite Reliability.

<https://doi.org/10.1371/journal.pone.0292747.t006>

Table 7. Discriminant validity.

|    | F1          | F2          |
|----|-------------|-------------|
| F1 | <b>0.96</b> |             |
| F2 | 0.84        | <b>0.87</b> |

Note: Square root of AVE in bold on diagonals.

<https://doi.org/10.1371/journal.pone.0292747.t007>

showed that the change was small, which is consistent with the trend of other studies on cultural adaptation of the GCPS-R [27]. Therefore, to ensure the integrity of the original scale structure, the remaining five items were retained to ensure that it could measure the severity grading of chronic pain.

In EFA and CFA, we finally obtained two common factors that were consistent with the factor structure of the original English version and the Turkish version of the GCPS-R [25, 27]. The first common factor was the PEG scale, which serves as a subscale of the GCPS-R and can be used to assess subjects' average pain severity, enjoyment of life, and interference with general activities. Krebs demonstrated the reliability of the PEG scale in primary care patients with moderate to severe chronic pain, with a reliability of 0.73, and in veterans, with a reliability of 0.89 [44]. The cross-cultural adaptation study of the Turkish version of the GCPS-R by Senturk showed that the reliability of the PEG subscale was 0.90 [27]. In this study, the internal consistency reliability of the PEG subscale was 0.95, which was similar to other research results, indicating that the C-GPS-R has good high reliability. The second common factor in this study was used to identify HCIP, which is defined as pain that is associated with persistent limitations in work, social, and self-care activities [45, 46]. This dimensional approach allows users to identify HCIP through two simple questions [45], providing a very easy and scientific method for grading chronic pain. In Dokyoung's study on the perception differences of chronic pain between young and older people with HCIP, the same dimensional approach was used to define severe pain, and the different impacts of HCIP on daily life activities were compared between the two groups [47]. The results showed that there were similarities and differences in the areas of pain impact between the two age groups. Both groups of subjects had similar pain impacts on basic physical activities (such as walking and standing) and instrumental daily activities (such as doing housework, driving, and shopping), but young people with HCIP considered work to be the third major activity affected by pain, while the older group ranked social activities, exercise, and sleep as the third most affected. Therefore, the definition of HCIP can not only conveniently, quickly, and effectively identify such patients but also refine the characteristics of the impact of this pain on daily life activities among different populations.

In addition, given the wide application of the NRS in clinical settings and the consistency of scoring rules with single-item scoring rules on the PEG Scale, we applied the NRS and the C-GCPS-R for comparison and tested the criterion validity of the C-GCPS-R. The correlation

Table 8. Criterion correlation validity.

|                | NRS    | PEG mean score <sup>a</sup> |
|----------------|--------|-----------------------------|
| NRS            | 1      |                             |
| PEG mean score | .969** | 1                           |

Note: \*\*. Correlation is significant at the 0.01 level (2-tailed).

<sup>a</sup> Average score of each item in PEG scale.

<https://doi.org/10.1371/journal.pone.0292747.t008>

Table 9. Binary logistic regression analysis of item 6 and chronic pain.

| Independent Variables | <i>B<sub>a</sub></i> | <i>SE<sub>b</sub></i> | Wald   | Exp(B) | Sig. |
|-----------------------|----------------------|-----------------------|--------|--------|------|
| Cp                    | 1.544                | .333                  | 21.485 | 4.682  | .000 |
| Constant              | -2.150               | .216                  | 99.347 | .117   | .000 |

Note: Cp: Chronic pain; SE, Standard Error.

<https://doi.org/10.1371/journal.pone.0292747.t009>

results showed a highly significant correlation between the average score on the PEG scale and the NRS score, which is consistent with other research results. Boonstra and Gerbershagen's study indicated that a score of 4 or 5 on a 0–10 scale can distinguish between mild and moderate pain [48, 49], while the PEG scale had a cutoff point of 12, which is consistent with other studies [50, 51]. Therefore, under the premise of consistent evaluation effectiveness with the NRS, this scale provides a multidimensional evaluation of the subject's pain level and the

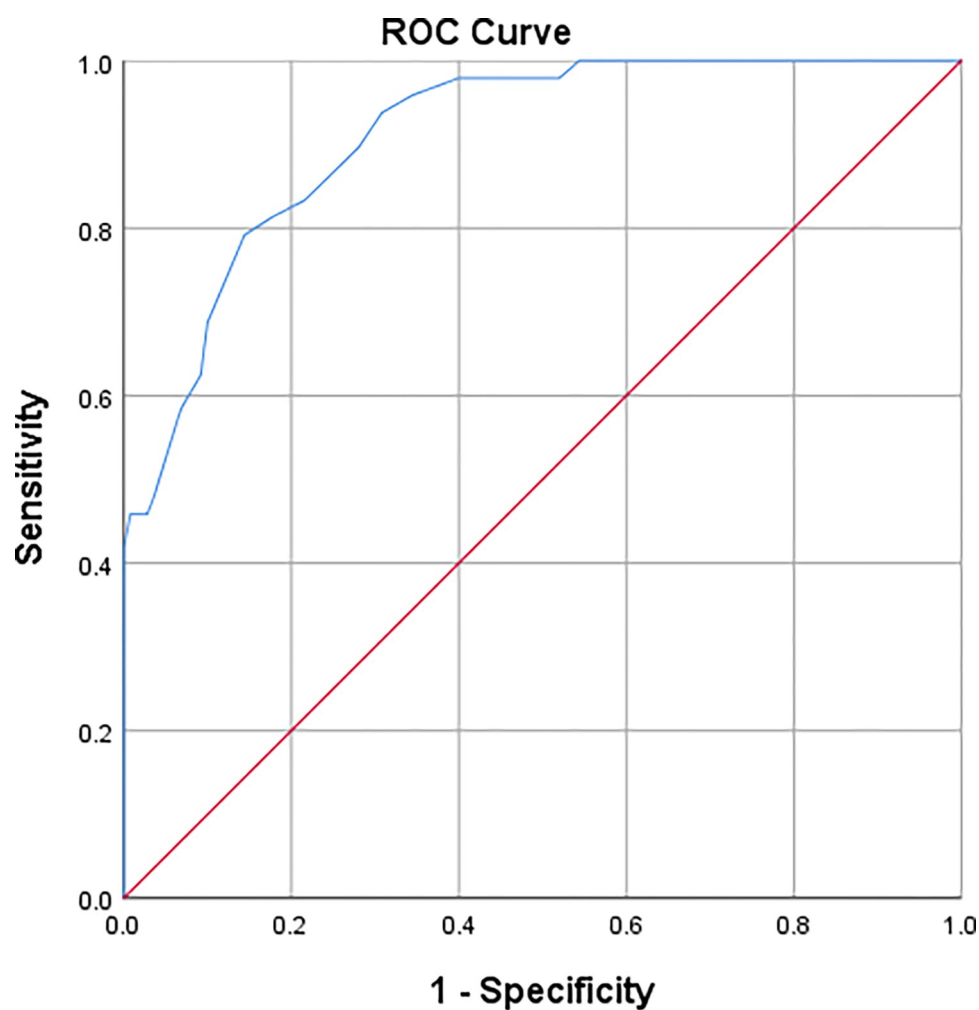

Diagonal segments are produced by ties.

Fig 2. The ROC of the C-GCPS-R based on item 6. The sensitivity was 81.3% and the specificity was 82.4%. The area under curve was 0.91 (95% [CI] 0.87–0.95).

<https://doi.org/10.1371/journal.pone.0292747.g002>

impact of pain on personal life, greatly enriching the practice of chronic pain assessment and facilitating clinical workers in better understanding the degree of chronic pain in patients and developing targeted interventions.

Given the role of item 6 in the clinical significance of chronic pain, we analyzed the relationship between chronic pain grade and subjects' work activities (Item 6). The results showed a significant correlation between the two, consistent with other studies [27]. In the original English version, the researchers demonstrated that subjects with chronic pain grade 3 had more activity limitations (such as housework, transportation, and going out) than those with grade 2 chronic pain by comparing the impact of different pain grades on subjects' daily lives. We also analyzed the sensitivity and specificity of item 6 for subjects with GCPS-R grade 3 and those who self-reported severe pain after evaluating indicators of poor health status, negative coping beliefs, activity limitations, and long-term opioid treatment. The results showed that the GCPS-R grade 3 had a good effect in identifying other HCIP indicators [25, 27]. In the Turkish version of GCPS-R, the authors compared the number of subjects who answered "Yes" to item 6 with those who had a chronic pain grade 3 and found that 84.1% of the subjects who were unable to work belonged to grade 3, indicating that item 6 had better sensitivity and specificity in assisting in identifying grade 3 chronic pain [27]. Both studies clarified the predictive role of specific pain grading on work activity impact using different pain assessment scales. Although this study found good predictability of pain grades 2 and 3 on work impact, further statistical analysis of the factor structure of the scale was limited due to its limited use. Therefore, further research should be conducted in the future.

During the process of assessing the chronic pain grades of the Chinese population, we found that the largest number of participants reported experiencing no pain, which may be attributed to several factors. First, although the C-GCPS-R can be conceptually and semantically interchangeable with the original scale during cultural adaptation, potential translation bias may still exist due to cultural differences between Chinese and Western cultures [52]. Second, ethnicity and culture have an important influence on the expression of pain among individuals [53], and personal attitudes and emotions toward pain may affect the perception of pain intensity. In Chinese Confucianism, the body was often metaphorically socialized as the state and politics in ancient China, and this category has been deeply ingrained in the context of Chinese culture. Therefore, Chinese culture does not encourage individuals to directly express physical and psychological pain, and endurance is considered an important virtue or survival strategy. This feature may greatly affect the expression of pain among the Chinese population [54].

This study has several limitations that should be noted. First, the sample size of this study is relatively limited, as it only includes the population of Changchun, China. Therefore, caution should be exercised when generalizing the findings of this study. Second, since data collection was performed in different hospitals in Changchun, which has high outpatient mobility, the reliability of test-retest reliability has not been confirmed; thus, the stability of the model requires further testing. Third, although the NRS was used as the criterion scale in this study for measuring pain levels, it only serves to distinguish between levels of pain and does not have any clinical evaluative function. Furthermore, other chronic pain assessment scales that have functional impact dimensions were not used to compare and evaluate the relationship between pain grading and work, making it impossible to further distinguish the differences in the impact of the C-GCPS-R grades 2 and 3 on work. In future studies, more diverse subjects should be recruited from different regions, sample size should be expanded to supplement the test-retest reliability of the C-GCPS-R and use more measurement tools related to chronic pain to further provide evidence of its applicability.



## 5 Conclusion

The present study has developed a Simplified Chinese version of the GCPS-R and further examined its validity and reliability. Results indicate that the C-GCPS-R has good psychometric properties and is a useful and reliable tool for assessing chronic pain grades among the Chinese population. Moreover, the C-GCPS-R with only 6 items and a two-factor structure may enhance its usability, making it a better option for clinical applications and scientific research in mainland China. However, further research is needed to improve the pain assessment properties of the C-GCPS-R.

## Supporting information

**S1 File. English version of the C-GCPS-R.**  
(PDF)

**S1 Table. Correlation of each item with the total scale of the C-GCPS-R.**  
(DOCX)

**S2 Table. The results of the receiver operating characteristic curve analysis using impact work as a standard.**  
(DOCX)

**S1 Data.**  
(ZIP)

## Author Contributions

**Conceptualization:** Bing Liang, Feng Li.

**Data curation:** Yuejin Wu.

**Formal analysis:** Yuejin Wu.

**Funding acquisition:** Bing Liang, Feng Li.

**Investigation:** Jiaxin Zhang.

**Methodology:** Yuejin Wu, Jiaxin Zhang.

**Resources:** Shumin Hao.

**Supervision:** Feng Li.

**Writing – original draft:** Yuejin Wu.

**Writing – review & editing:** Bing Liang.

## References

1. (IASP) IASoP. Classification of chronic pain. 1986.
2. Treede RD, Rief W, Barke A, Aziz Q, Bennett MI, Benoliel R, et al. A classification of chronic pain for ICD-11. *Pain*. 2015; 156(6):1003–7. <https://doi.org/10.1097/j.pain.000000000000160> PMID: 25844555
3. Goldberg DS, McGee SJ. Pain as a global public health priority. *BMC PUBLIC HEALTH*. 2011;11.
4. Dureja GP, Jain PN, Shetty N, Mandal SP, Prabhoo R, Joshi M, et al. Prevalence of Chronic Pain, Impact on Daily Life, and Treatment Practices in India. *PAIN PRACTICE*. 2014; 14(2):E51–E62. <https://doi.org/10.1111/papr.12132> PMID: 24304963

5. Duca LM, Helmick CG, Barbour KE, Nahin RL, Von Korff M, Murphy LB, et al. A Review of Potential National Chronic Pain Surveillance Systems in the United States. *JOURNAL OF PAIN*. 2022; 23(9):1492–509. <https://doi.org/10.1016/j.jpain.2022.02.013> PMID: 35421595
6. Mohamed Zaki LR, Hairi NN. A Systematic Review of the Prevalence and Measurement of Chronic Pain in Asian Adults. *Pain Management Nursing*. 2015; 16(3):440–52. <https://doi.org/10.1016/j.pmn.2014.08.012> PMID: 25439125
7. Rayner L, Hotopf M, Petkova H, Matcham F, Simpson A, McCracken LM. Depression in patients with chronic pain attending a specialised pain treatment centre: prevalence and impact on health care costs. *Pain*. 2016; 157(7):1472–9. <https://doi.org/10.1097/j.pain.0000000000000542> PMID: 26963849
8. Gaskin DJ, Richard P. The Economic Costs of Pain in the United States. *JOURNAL OF PAIN*. 2012; 13(8):715–24. <https://doi.org/10.1016/j.jpain.2012.03.009> PMID: 22607834
9. Schofield P. Does assessment of pain vary across age groups? *PAIN MANAGEMENT*. 2019; 9(4):343–5. <https://doi.org/10.2217/pmt-2019-0007> PMID: 31237184
10. Scott J, Huskisson EC. Graphic representation of pain. *Pain*. 1976; 2(2):175–84. PMID: 1026900
11. Xueqin Liu, Li L. Selection of pain intensity assessment scales for older people. *Chinese Journal of Nursing*. 2004(03):8–10.
12. Hawker GA, Mian S, Kendzerska T, French M. Measures of Adult Pain Visual Analog Scale for Pain (VAS Pain), Numeric Rating Scale for Pain (NRS Pain), McGill Pain Questionnaire (MPQ), Short-Form McGill Pain Questionnaire (SF-MPQ), Chronic Pain Grade Scale (CPGS), Short Form-36 Bodily Pain Scale (SF-36 BPS), and Measure of Intermittent and Constant Osteoarthritis Pain (ICOAP). *ARTHRITIS CARE & RESEARCH*. 2011; 63:S240–S52.
13. Huskisson EC, Jones J, Scott PJ. Application of visual-analogue scales to the measurement of functional capacity. *Rheumatology and rehabilitation*. 1976; 15(3):185–7. <https://doi.org/10.1093/rheumatology/15.3.185> PMID: 968347
14. Juyan T. Nursing assessment of pain. *Chinese Journal of Nursing*. 1995(02):123–5.
15. Von Korff M, Dworkin SF, Le Resche L. Graded chronic pain status: an epidemiologic evaluation. *Pain*. 1990; 40(3):279–91. [https://doi.org/10.1016/0304-3959\(90\)91125-3](https://doi.org/10.1016/0304-3959(90)91125-3) PMID: 2326094
16. Alhalal E, Jackson KT. Evaluation of the Arabic version of the Chronic Pain Grade scale: Psychometric properties. *RESEARCH IN NURSING & HEALTH*. 2021; 44(2):403–12. <https://doi.org/10.1002/nur.22116> PMID: 33586152
17. Stahlschmidt L, Barth F, Zernikow B, Wager J. Therapie-Outcome ein Jahr nach Erstvorstellung in einer pädiatrischen Schmerzambulanz. *Der Schmerz*. 2017; 31(6):601–9.
18. de Heer EW, Gerrits MMJG, Beekman ATF, Dekker J, van Marwijk HWJ, de Waal MWM, et al. The Association of Depression and Anxiety with Pain: A Study from NESDA. *PLOS ONE*. 2014; 9(10): e106907. <https://doi.org/10.1371/journal.pone.0106907> PMID: 25330004
19. Wager J, Hechler T, Darlington AS, Hirschfeld G, Vocks S, Zernikow B. Classifying the severity of paediatric chronic pain—an application of the chronic pain grading. *EUROPEAN JOURNAL OF PAIN*. 2013; 17(9):1393–402. <https://doi.org/10.1002/j.1532-2149.2013.00314.x> PMID: 23576527
20. Torrance N, Mansoor R, Wang H, Gilbert S, Macfarlane GJ, Serpell M, et al. Association of opioid prescribing practices with chronic pain and benzodiazepine co-prescription: a primary care data linkage study. *British Journal of Anaesthesia*. 2018; 120(6):1345–55. <https://doi.org/10.1016/j.bja.2018.02.022> PMID: 29793600
21. van Hecke O, Hocking LJ, Torrance N, Campbell A, Padmanabhan S, Porteous DJ, et al. Chronic pain, depression and cardiovascular disease linked through a shared genetic predisposition: Analysis of a family-based cohort and twin study. *PLOS ONE*. 2017; 12(2):e0170653. <https://doi.org/10.1371/journal.pone.0170653> PMID: 28225781
22. Ferrer-Pena R, Gil-Martinez A, Pardo-Montero J, Jimenez-Penick V, Gallego-Izquierdo T, La Touche R. Adaptation and validation of the Spanish version of the graded chronic pain scale. *Reumatologia clinica*. 2016; 12(3):130–8.
23. Ozden F, Ozkeskin M, Bakirhan S, Karaman ON, Aydogmus H. The reliability and validity of the Turkish version of the graded chronic pain scale in patients with chronic low back pain. *EUROPEAN SPINE JOURNAL*. 2021; 30(10):2955–61. <https://doi.org/10.1007/s00586-021-06910-4> PMID: 34196801
24. Maixner W, Fillingim RB, Williams DA, Smith SB, Slade GD. Overlapping Chronic Pain Conditions: Implications for Diagnosis and Classification. *JOURNAL OF PAIN*. 2016; 17(9):T93–T107. <https://doi.org/10.1016/j.jpain.2016.06.002> PMID: 27586833
25. Von Korff M, DeBar LL, Krebs EE, Kerns RD, Deyo RA, Keefe FJ. Graded chronic pain scale revised: mild, bothersome, and high-impact chronic pain. *PAIN*. 2020; 161(3):651–61. <https://doi.org/10.1097/j.pain.0000000000001758> PMID: 31764390

26. Ferrer-Peña R, Gil-Martínez A, Pardo-Montero J, Jiménez-Penick V, Gallego-Izquierdo T, La Touche R. Adaptación y validación de la Escala de gradación del dolor crónico al español. *Reumatología Clínica*. 2016; 12(3):130–8.
27. Senturk IA, Turan SA, Senturk E, Icen NK. Validation, reliability, and cross-cultural adaptation study of Graded Chronic Pain Scale Revised into Turkish in patients with primary low back pain. *PAIN PRACTICE*. 2022; 22(3):306–21. <https://doi.org/10.1111/papr.13070> PMID: 34463039
28. Brislin RW. CULTURE AND EVALUATION—PATTON, MQ. *CONTEMPORARY PSYCHOLOGY*. 1986; 31(11):887–.
29. Jones PS, Lee JW, Phillips LR, Zhang XWE, Jaceldo KB. An adaptation of Brislin's translation model for cross-cultural research. *NURSING RESEARCH*. 2001; 50(5):300–4. <https://doi.org/10.1097/00006199-200109000-00008> PMID: 11570715
30. Brislin RW. BACK-TRANSLATION FOR CROSS-CULTURAL RESEARCH. *JOURNAL OF CROSS-CULTURAL PSYCHOLOGY*. 1970; 1(3):185–216.
31. Jensen MP, Karoly P, Braver S. The measurement of clinical pain intensity: a comparison of six methods. *Pain*. 1986; 27(1):117–26. [https://doi.org/10.1016/0304-3959\(86\)90228-9](https://doi.org/10.1016/0304-3959(86)90228-9) PMID: 3785962
32. Li L, Liu X, Herr K. Postoperative pain intensity assessment: a comparison of four scales in Chinese adults. *Pain Med*. 2007; 8(3):223–34. <https://doi.org/10.1111/j.1526-4637.2007.00296.x> PMID: 17371409
33. Juying Z, Ruifang Z, Jiawei Y. Application of Five Finger Method in Pain Intensity Assessment. *Chinese Journal of Nursing*. 2005(06):409–11.
34. Li L, Herr K, Chen P. Postoperative pain assessment with three intensity scales in Chinese elders. *J Nurs Scholarsh*. 2009; 41(3):241–9. <https://doi.org/10.1111/j.1547-5069.2009.01280.x> PMID: 19723272
35. Kaiser HF. A second generation little jiffy. *Psychometrika*. 1970; 35(4):401–15.
36. Bartlett MS. TESTS OF SIGNIFICANCE IN FACTOR ANALYSIS. *BRITISH JOURNAL OF PSYCHOLOGY-STATISTICAL SECTION*. 1950; 3:77–85.
37. Ab Hamid MR, Sami W, Sidek MHM. Discriminant Validity Assessment: Use of Fornell & Larcker criterion versus HTMT Criterion. 1ST INTERNATIONAL CONFERENCE ON APPLIED & INDUSTRIAL MATHEMATICS AND STATISTICS 2017 (ICOAIMS 2017); 20172017.
38. Yan H. Nursing research. Beijing: People's Health Publishing; 2012.
39. Vivienne Wu SF, Courtney M, Edwards H, McDowell J, Shortridge-Baggett LM, Chang PJ. Development and validation of the Chinese version of the Diabetes Management Self-efficacy Scale. *Int J Nurs Stud*. 2008; 45(4):534–42. <https://doi.org/10.1016/j.ijnurstu.2006.08.020> PMID: 17055509
40. Wei X, Xu X, Zhao Y, Hu W, Bai Y, Li M. The Chinese version of the Tampa Scale for Kinesiophobia was cross-culturally adapted and validated in patients with low back pain. *J Clin Epidemiol*. 2015; 68(10):1205–12. <https://doi.org/10.1016/j.jclinepi.2015.07.003> PMID: 26169840
41. Ng SSM, Ho LYW, Chan NH, Liu TW, So B. Psychometric Properties of the Chinese Version of the Oxford Participation and Activities Questionnaire in People with Stroke. *Int J Environ Res Public Health*. 2022; 19(23). <https://doi.org/10.3390/ijerph192315450> PMID: 36497524
42. Salaffi F, Stancati A, Grassi W. Reliability and validity of the Italian version of the Chronic Pain Grade questionnaire in patients with musculoskeletal disorders. *Clin Rheumatol*. 2006; 25(5):619–31. <https://doi.org/10.1007/s10067-005-0140-y> PMID: 16421646
43. Klasen BW, Hallner D, Schaub C, Willburger R, Hasenbring M. Validation and reliability of the German version of the Chronic Pain Grade questionnaire in primary care back pain patients. *Psychosoc Med*. 2004; 1:Doc07. PMID: 19742049
44. Krebs EE, Lorenz KA, Bair MJ, Damush TM, Wu J, Sutherland JM, et al. Development and initial validation of the PEG, a three-item scale assessing pain intensity and interference. *J Gen Intern Med*. 2009; 24(6):733–8. <https://doi.org/10.1007/s11606-009-0981-1> PMID: 19418100
45. Dahlhamer J, Lucas J, Zelaya C, Nahin R, Mackey S, DeBar L, et al. Prevalence of Chronic Pain and High-Impact Chronic Pain Among Adults—United States, 2016. *MMWR Morb Mortal Wkly Rep*. 2018; 67(36):1001–6. <https://doi.org/10.15585/mmwr.mm6736a2> PMID: 30212442
46. Von Korff M, Scher AI, Helmick C, Carter-Pokras O, Dodick DW, Goulet J, et al. United States National Pain Strategy for Population Research: Concepts, Definitions, and Pilot Data. *J Pain*. 2016; 17(10):1068–80. <https://doi.org/10.1016/j.jpain.2016.06.009> PMID: 27377620
47. You DS, Ziadni MS, Hettie G, Darnall BD, Cook KF, Von Korff MR, et al. Comparing Perceived Pain Impact Between Younger and Older Adults With High Impact Chronic Pain: A Cross-Sectional Qualitative and Quantitative Survey. *Front Pain Res (Lausanne)*. 2022; 3:850713. <https://doi.org/10.3389/fpain.2022.850713> PMID: 35465295

48. Boonstra AM, Preuper HRS, Balk GA, Stewart RE. Cut-off points for mild, moderate, and severe pain on the visual analogue scale for pain in patients with chronic musculoskeletal pain. *PAIN*. 2014; 155(12):2545–50. <https://doi.org/10.1016/j.pain.2014.09.014> PMID: 25239073
49. Gerbershagen HJ, Rothaug J, Kalkman CJ, Meissner W. Determination of moderate-to-severe postoperative pain on the numeric rating scale: a cut-off point analysis applying four different methods. *BRITISH JOURNAL OF ANAESTHESIA*. 2011; 107(4):619–26. <https://doi.org/10.1093/bja/aer195> PMID: 21724620
50. Tubach F, Ravaud P, Martin-Mola E, Awada H, Bellamy N, Bombardier C, et al. Minimum clinically important improvement and patient acceptable symptom state in pain and function in rheumatoid arthritis, ankylosing spondylitis, chronic back pain, hand osteoarthritis, and hip and knee osteoarthritis: Results from a prospective multinational study. *ARTHRITIS CARE & RESEARCH*. 2012; 64(11):1699–707. <https://doi.org/10.1002/acr.21747> PMID: 22674853
51. Hirschfeld G, Zernikow B. Variability of "optimal" cut points for mild, moderate, and severe pain: Neglected problems when comparing groups. *PAIN*. 2013; 154(1):154–9. <https://doi.org/10.1016/j.pain.2012.10.008> PMID: 23182623
52. Xiaoxia Z. Analysis of the influence of Chinese and Western cultural differences in English-Chinese translation. *Chinese Character Culture*. 2021(20):140–1.
53. Bates MS, Edwards TW, Anderson KO. Ethnocultural influences on variation in chronic pain perception. *PAIN*. 1993; 52(1). [https://doi.org/10.1016/0304-3959\(93\)90120-E](https://doi.org/10.1016/0304-3959(93)90120-E) PMID: 8446431
54. Shaojiang M, Xudong Z. Pain expression and somatization of Chinese expression. *Medicine and Philosophy (Humanities and Social Medicine Edition)*. 2008(03):40–2.
